# Supplementary material
Source: PubMed Central journal article supplement (PMC4878657)

# Supplementary Figure 1

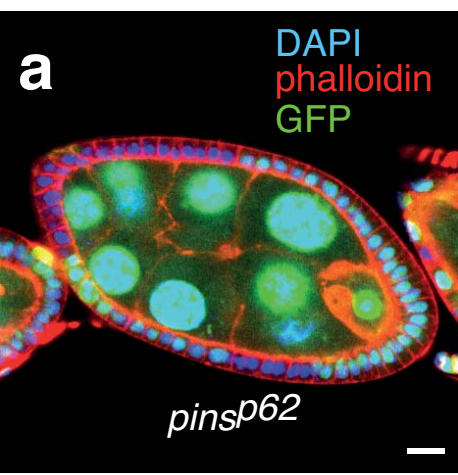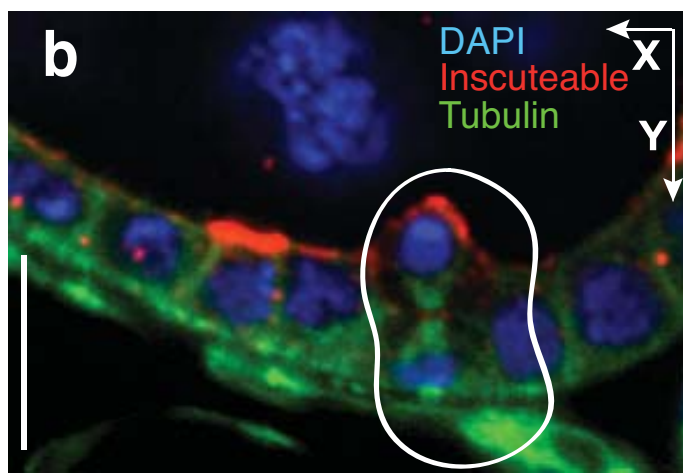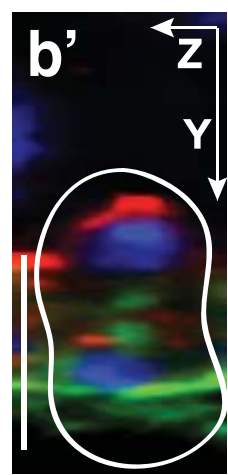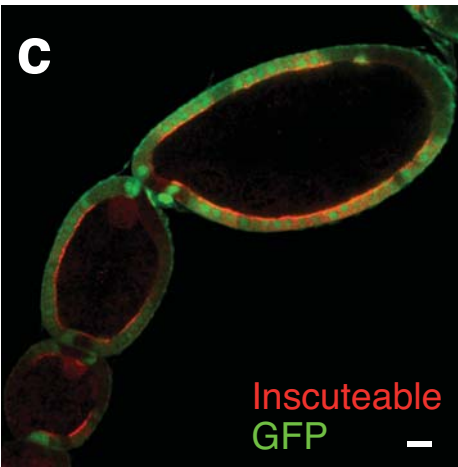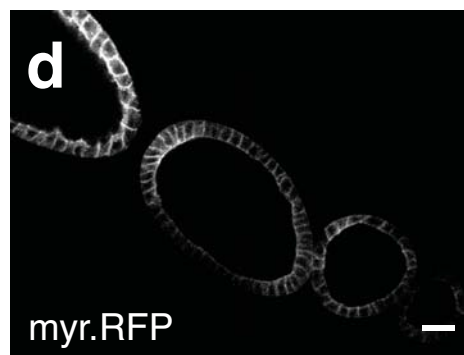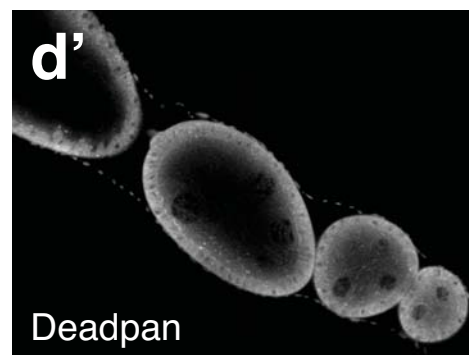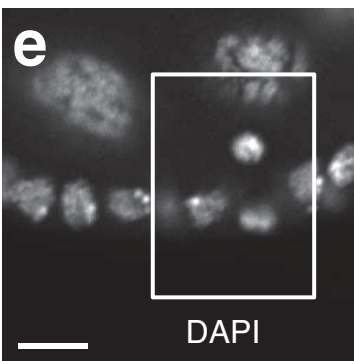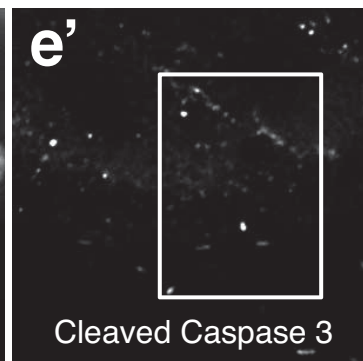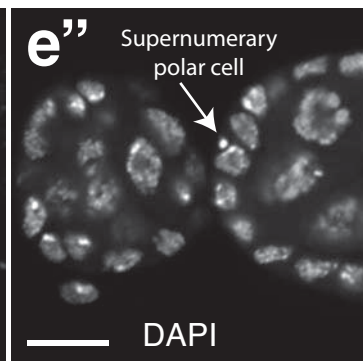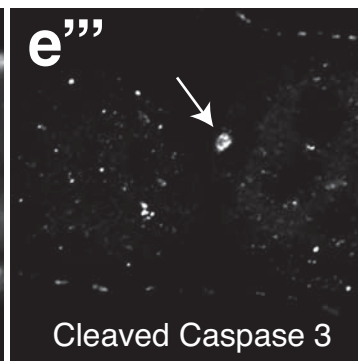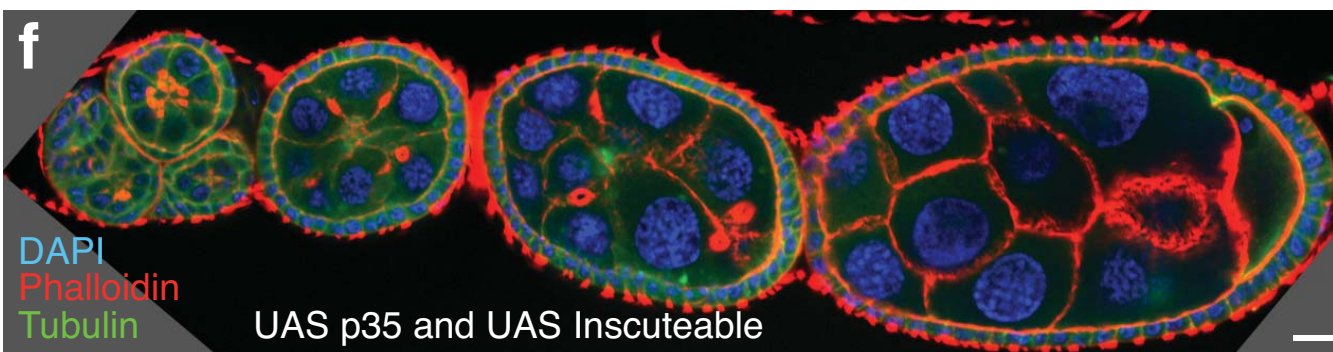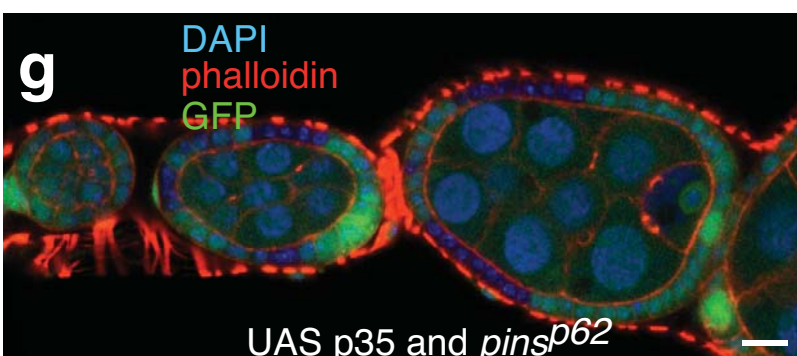

Supplement: NIHMS64930-supplement-Supplementary_Figure_1.pdf [file NIHMS64930-supplement-Supplementary_Figure_1.pdf]

# Supplementary Figure 2

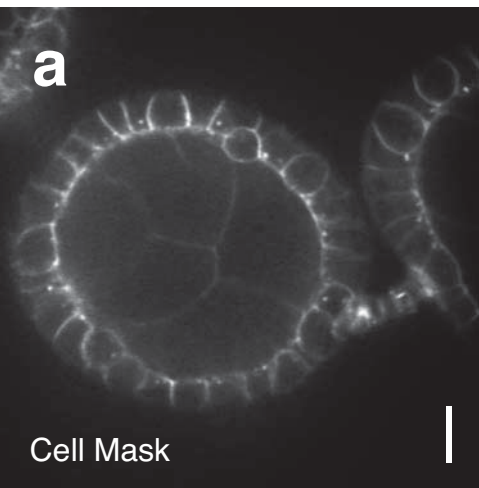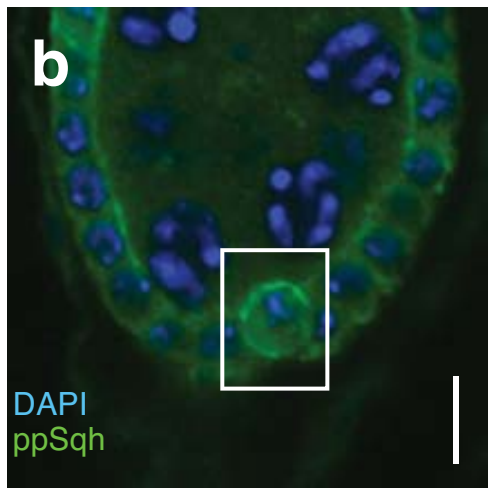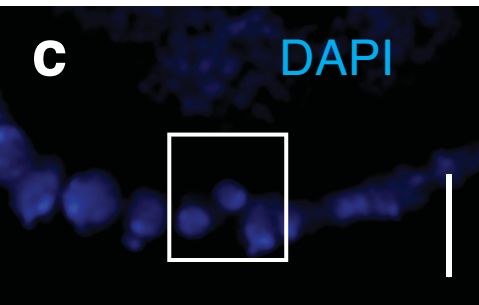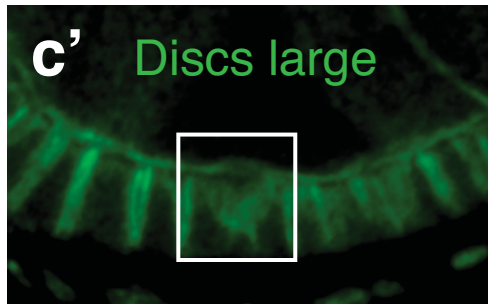

Supplement: NIHMS64930-supplement-Supplementary_Figure_2.pdf [file NIHMS64930-supplement-Supplementary_Figure_2.pdf]

# Supplementary Figure 3

**a**

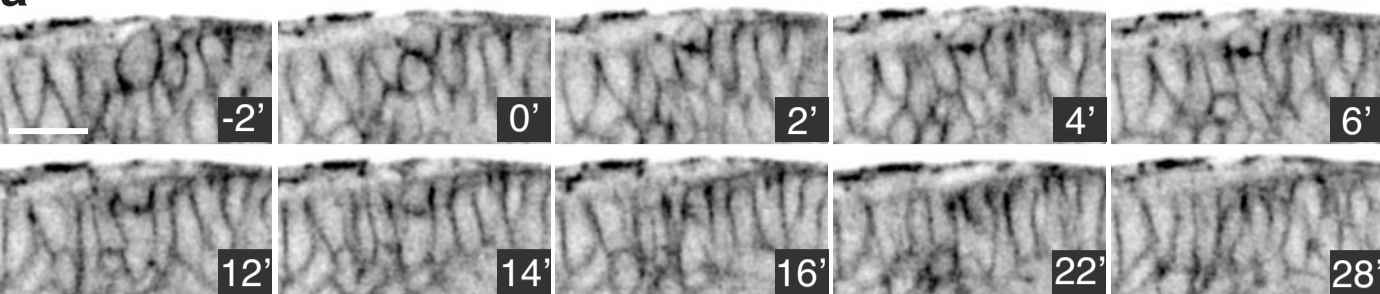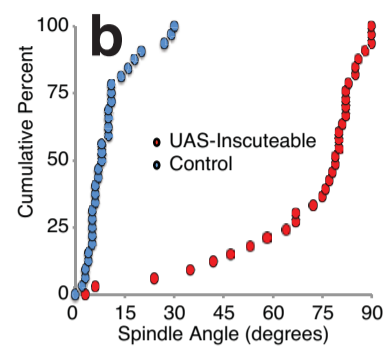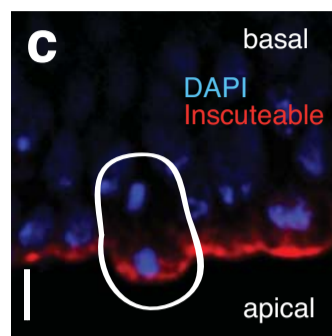

**d**

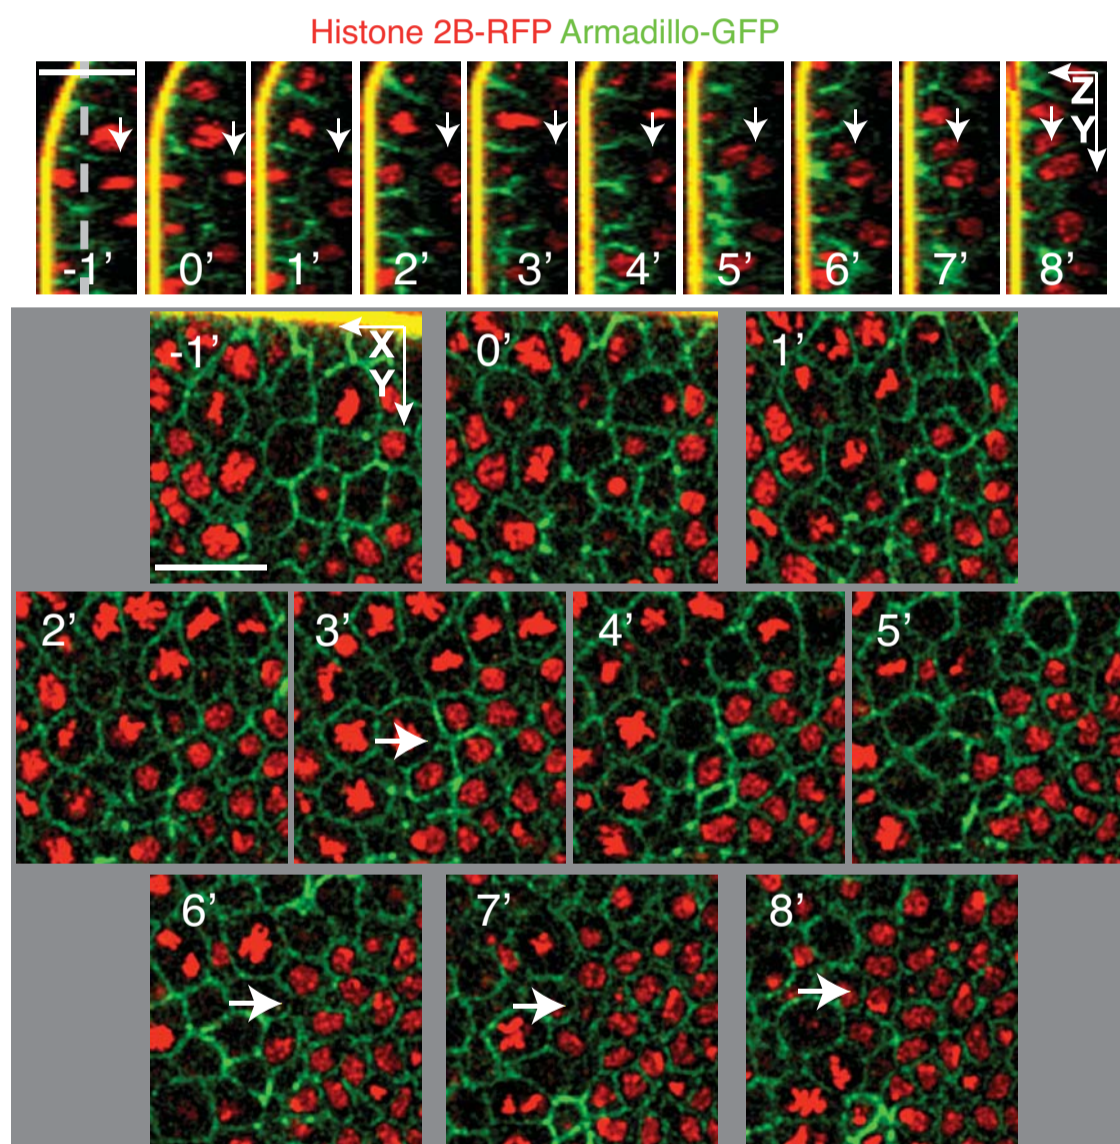

Supplement: NIHMS64930-supplement-Supplementary_Figure_3.pdf [file NIHMS64930-supplement-Supplementary_Figure_3.pdf]

# Supplementary Figure 5

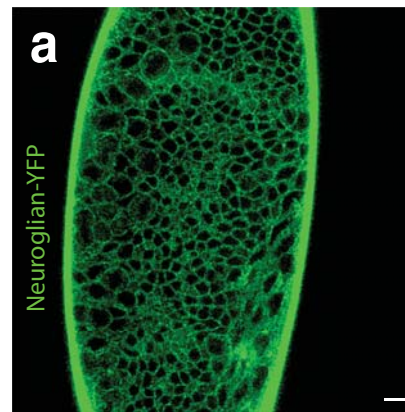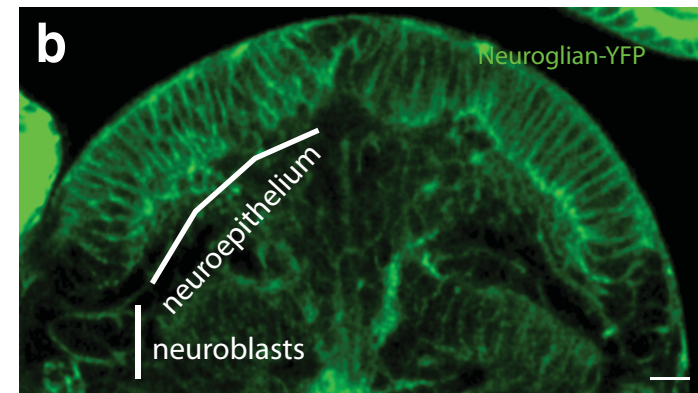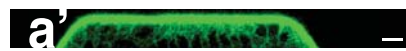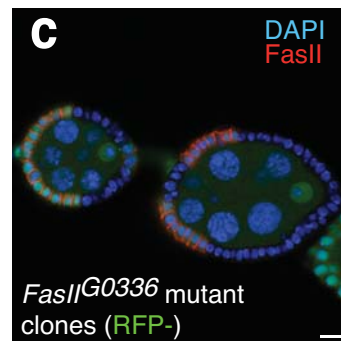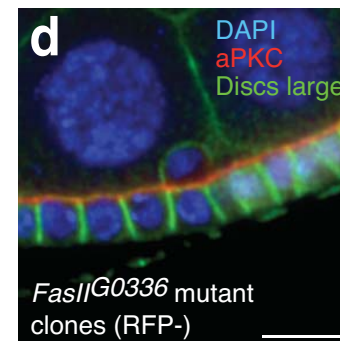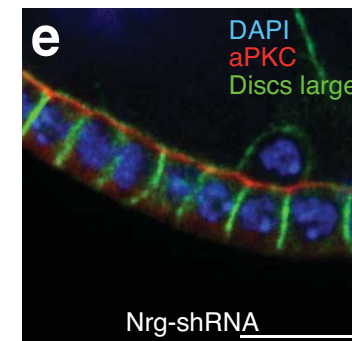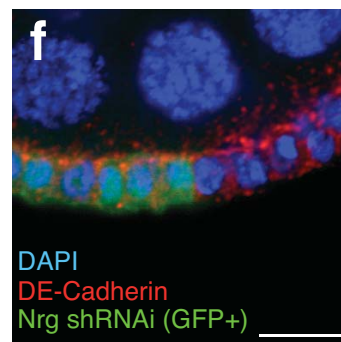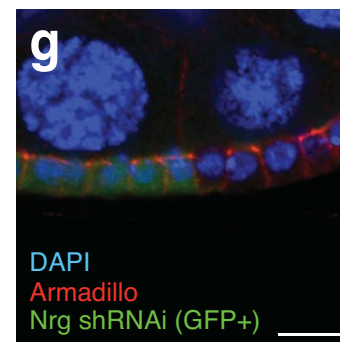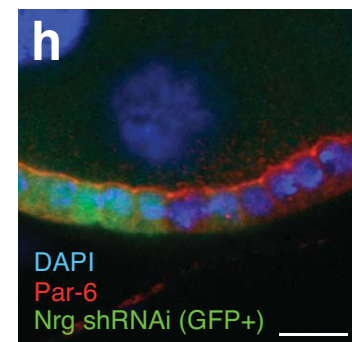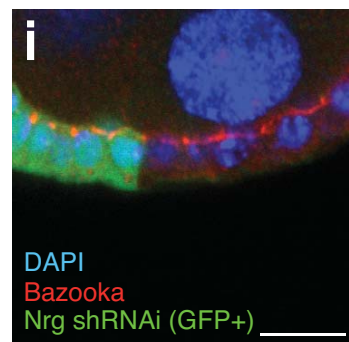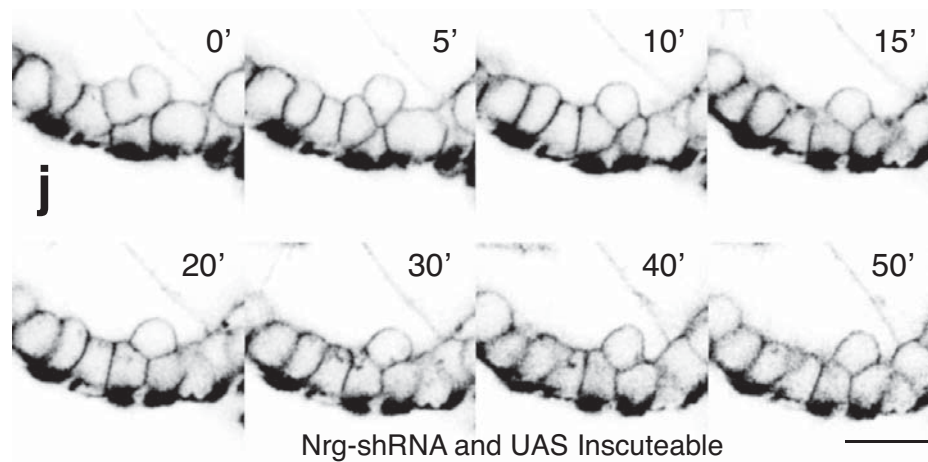

Supplement: NIHMS64930-supplement-Supplementary_Figure_5.pdf [file NIHMS64930-supplement-Supplementary_Figure_5.pdf]
